# Supplementary material for: The Predictors of COVID-19 Vaccine Hesitancy among Turkish Cypriot Parents
Source: Preprints.org preprint supplement (doi:10.20944/preprints202407.0716.v1), 2024-07-09
Supplement: Supplementary file 1 [file supplementary]

**Table 1**

*Logistic Regression Analysis for Vaccine Hesitancy/Refusal of Parents for Covid-19 Vaccines for Children*

| Predictor | β | SEβ | Wald’s  X2 | df | p | eβ |
| --- | --- | --- | --- | --- | --- | --- |
| Constant  Positive Parenting  Poor Supervision  Conspiracy Thinking  Ruminative Thinking | -.554  -.593  -2.720  1.835  -1.587 | .396  .690  1.025  .474  .524 | 1.963  .740  7.049  3.097  9.159 | 1  1  1  1  1 | .161  .390  .008*  .038**  .002* | .574  .552  .066  2.304  .204 |

*Note.* Cox and Snell R² = .361 Nagelkerke R² = .482 c-statistics: 74.5% *p<.01, **p<.05

**Table 2**

*Logistic Regression Analysis for Vaccine Hesitancy/Refusal of Parents for themselves*

| Predictor | β | SEβ | Wald’s  X2 | df | p | eβ |
| --- | --- | --- | --- | --- | --- | --- |
| Constant  Positive Parenting  Poor Supervision  Conspiracy Thinking  Ruminative Thinking | -4.661  -3.314  -1.514  3.129  -2.540 | 1.304  1.496  1.233  1.066  .940 | 12.768  4.905  1.506  8.614  7.300 | 1  1  1  1  1 | .000  .027**  .220  .003*  .007* | .009  .036  .220  22.855  .079 |

*Note.* Cox and Snell R² = .422 Nagelkerke R² = .721 c-statistics: 92.6% *p<.01, **p<.05
